# Supplementary material for: Clinical Application of Estimating Hepatitis B Virus Quasispecies Complexity by Massive Sequencing: Correlation between Natural Evolution and On-Treatment Evolution
Source: PubMed Central journal article supplement (PMC4231103; doi:10.1371/journal.pone.0112306), 2014-11-13
Supplement: pone.0112306.s002.pdf [file pone.0112306.s002.pdf]

| Pt | Condition | Sn   | Mf       | Pi       | preCore MfAA | Core Mfaa |
|----|-----------|------|----------|----------|--------------|-----------|
| 1  | B         | 0,1  | 8,30E-05 | 1,65E-04 | 1,67         | 1,39      |
|    | TF        | 0,1  | 8,40E-05 | 1,67E-04 | 1,88         | 0,64      |
|    | TNR       | 0,04 | 1,90E-05 | 3,70E-05 | 0,00         | 0,00      |
| 2  | B         | 0,37 | 6,61E-04 | 1,03E-03 | 0,00         | 0,82      |
|    | TF        | 0,42 | 7,38E-04 | 1,08E-03 | 0,00         | 0,52      |
|    | TNR       | 0,23 | 2,60E-04 | 4,79E-04 | 0,00         | 1,47      |
| 3  | B         | 0,23 | 3,07E-04 | 5,96E-04 | 15,17        | 0,34      |
|    | TF        | 0,43 | 2,23E-03 | 3,50E-03 | 0,65         | 1,33      |
|    | TNR       | 0,08 | 5,32E-05 | 1,06E-04 | 14,25        | 56,73     |
| 4  | B         | 0,04 | 1,50E-05 | 3,00E-05 | 0,56         | 0,38      |
|    | TF        | 0,05 | 1,91E-05 | 3,80E-05 | 0,75         | 0,46      |
|    | TNR       | 0,05 | 2,08E-05 | 4,10E-05 | 1,17         | 0,31      |
| 5  | B         | 0,52 | 1,35E-03 | 2,43E-03 | 4,29         | 9,89      |
|    | TF        | 0,68 | 3,22E-03 | 4,74E-03 | 197,10       | 24,15     |
|    | TNR       | 0,33 | 5,46E-04 | 1,05E-03 | 36,29        | 3,47      |
| 6  | B         | 0,42 | 1,27E-03 | 2,26E-03 | 51,75        | 0,95      |
|    | TF        | 0,71 | 6,05E-03 | 8,36E-03 | 110,00       | 122,21    |
|    | TNR       | 0,48 | 2,33E-03 | 3,42E-03 | 3,38         | 67,33     |
| 7  | B         | 0,58 | 1,65E-03 | 2,37E-03 | 2,28         | 74,36     |
|    | TF        | 0,61 | 1,89E-03 | 2,71E-03 | 0,00         | 399,92    |
|    | TNR       | 0,03 | 6,60E-06 | 1,30E-05 | 0,54         | 0,00      |
| 8  | B         | 0,48 | 1,17E-02 | 1,47E-02 | 161,31       | 303,07    |
|    | TF        | 0,13 | 6,79E-04 | 1,33E-03 | 5,56         | 18,82     |
|    | TNR       | 0,39 | 1,71E-02 | 2,82E-02 | 284,35       | 207,19    |
| 9  | B         | 0,59 | 5,59E-03 | 6,33E-03 | 192,06       | 140,07    |
|    | TF        | 0,74 | 1,03E-02 | 1,76E-02 | 59,48        | 96,82     |
|    | TNR       | 0,36 | 8,03E-04 | 1,54E-03 | 35,96        | 11,06     |
| 10 | B         | 0,61 | 5,63E-03 | 7,67E-03 | 0,00         | 164,42    |
|    | TF        | 0,26 | 1,09E-03 | 2,04E-03 | 1,73         | 16,84     |
|    | TNR       | 0,2  | 2,29E-04 | 4,55E-04 | 11,73        | 1,49      |
